# Supplementary material
Source: Springer Nature journal article supplement (https://www.springermedizin.de/resource/supplementary/13276_2011_24_MOESM1_ESM.pdf/9676594)
Supplement: MOESM1 [file 9676594]

| Sections                 |                             | <b>HSV-1</b>                                                                                      | <b>VZV</b>                                                                                                                                                       |
|--------------------------|-----------------------------|---------------------------------------------------------------------------------------------------|------------------------------------------------------------------------------------------------------------------------------------------------------------------|
| <b>Viral Genome</b>      | Genes                       | ~80: 4 diploid (ICP4, 0, 34.5, LAT)                                                               | 68: 3 diploid (ORFs 62, 63, 64)                                                                                                                                  |
|                          | Size                        | ~152kbp                                                                                           | ~125kbp                                                                                                                                                          |
|                          | G+C content                 | -67%                                                                                              | -47%                                                                                                                                                             |
|                          | Repeats                     | -Large repeats for both UL and US                                                                 | -Large on US only; 88.5bp on UL                                                                                                                                  |
|                          | Isomers                     | 4                                                                                                 | Mostly 2 with UL region fixed                                                                                                                                    |
|                          | miRNA                       | From LAT region- role not yet clear                                                               | No known miRNAs                                                                                                                                                  |
| <b>Viral Proteins</b>    | regulation                  | Regulated Cascade –defined as $\alpha$ , $\beta$ 1, $\beta$ 2, $\gamma$ 1, $\gamma$ 2             | Likely similar, but difficult to define experimentally                                                                                                           |
|                          | Immediate Early differences | -six genes (ICP0, ICP4, ICP27, ICP22, ICP1.5, ICP47.<br>-All have TAATGARAT motif in IE promoters | -Three genes reported to date<br>-ORF/IE62(ICP4 Eq) ORF/IE4( ICP27 eq) and ORF/IE63 (ICP22 eq)<br>-No ortholog of ICP47.<br>-Only IE62 has TAATGARAT in promoter |
|                          | Short Region differences    | -gD, an essential protein involved in receptor & entry<br>-gE not required in culture             | -No gD, gE is essential-<br>-gE is key receptor binding protein<br>-Missing several HSV equivalents                                                              |
|                          | Tegument differences        | -UL48 (VP16) required in culture:<br>-UL49 not required                                           | -ORF10(VP16 Eq) not required in culture:<br>-ORF9 (UL49 eq) required                                                                                             |
| <b>Primary Infection</b> | Route of Infection          | Spread through direct contact.                                                                    | Spread via aerosol and inhalation.                                                                                                                               |
|                          | Location of 1° infection    | -Epithelia in mucosa, cornea or in epidermal layers of the skin<br>-Usually no viremia            | -Epithelial and immune cells in respiratory lymphoid tissues, tonsils<br>-Cell associated viremia<br>-Secondary infection at the sub-dermis                      |
|                          | Spread to neurons           | -Usually local only<br>-Accesses neuronal axon termini in skin                                    | -Systemic across entire neuraxis<br>-Same as HSV; may also access neurons during viremia through immune cells                                                    |
|                          | Innate                      | TLR-2,3,9 respond to infection                                                                    | Thought to be the same, but not known                                                                                                                            |
|                          |                             | IFN regulates infection                                                                           | IFN regulates infection                                                                                                                                          |
|                          |                             | NO helps retard viral replication                                                                 | Role of NO not known                                                                                                                                             |
|                          |                             | ICP0 degrades PML and ND10 proteins                                                               | Susceptible to PML caging.<br>ORF61 modifies ND10, does not degrade PML                                                                                          |

|                                                                              |                          |                                                                                               |                                                                                                                                                                                                           |
|------------------------------------------------------------------------------|--------------------------|-----------------------------------------------------------------------------------------------|-----------------------------------------------------------------------------------------------------------------------------------------------------------------------------------------------------------|
| <b>Innate and adaptive immunity</b>                                          | Adaptive T cell response | CD4 and CD8 encounter antigen on DCs and respond to infection                                 | -T cells infected by VZV leading to viral spread.<br>-CD4 and CD8 T cells are VZV specific                                                                                                                |
|                                                                              | DC                       | Can infect and reduce presentation to T cells by DCs                                          | -Can infect and reduce presentation to T cells by DCs                                                                                                                                                     |
|                                                                              | Humoral Response         | Elicit antibodies against broad viral antigens. IgA, IgG and IgM                              | -Elicit antibodies against broad viral antigens. IgA, IgG and IgM.<br>-Antibodies are used in high risk patients to treat VZV<br>-Antibody has less role on control of infection/latency and reactivation |
|                                                                              | Immune Evasion           | ICP47 blocks TAP function.                                                                    | -Does not block TAP function.<br>-Still blocks MHC I and II expression.<br>-Blocks MHC I by ORF66 kinase                                                                                                  |
|                                                                              |                          | Inhibit IFN responses thru VHS, ICP0, and $\gamma$ 34.5                                       | -Inhibit IFN responses by IE63, IE62<br>-ORF61 blocks NFkB signaling                                                                                                                                      |
|                                                                              |                          | gC blocks complement deposition                                                               | No equivalent activity for gC                                                                                                                                                                             |
|                                                                              |                          | Fc binding ability of gE                                                                      | VZV gE and gI complex to bind Fc                                                                                                                                                                          |
| ICP22, Us5, Us3 and LAT inhibit apoptosis by NK and CD8+ cell mediated lysis |                          | ORF63 blocks apoptosis                                                                        |                                                                                                                                                                                                           |
| <b>Models and Neuronal Latency</b>                                           | Animal modeling          | -Most animal models replicate virus<br>-Most show similar disease to humans                   | -Guinea pig only small natural animal model that replicates virus<br>-No natural model of varicella<br>-No model of reactivated disease                                                                   |
|                                                                              | Location of latency      | Sensory ganglia, especially trigeminal ganglia                                                | -Most sensory and autonomic ganglia<br>-Distributed across entire neuraxis                                                                                                                                |
|                                                                              | Load                     | Generally higher genome load than VZV                                                         | About one magnitude lower genome load                                                                                                                                                                     |
| <b>Maintenance latency</b>                                                   |                          | -Endless Circular episome.<br>-Heterochromatinated state                                      | -Endless circular episome.<br>-Assumed to be Heterochromatinated state                                                                                                                                    |
|                                                                              | Latent Gene Expression   | -Abundant transcripts from LAT region<br>-LATs processed into miRNAs<br>-LATs block apoptosis | -RNAs for ORFs 4,21,61,10,29,62,63, and 66. -<br>-Reported protein expression is controversial<br>-ORF63 most often reported as expressed                                                                 |

|                                 |                        |                                                                                                                                   |                                                                                                                                                                                         |
|---------------------------------|------------------------|-----------------------------------------------------------------------------------------------------------------------------------|-----------------------------------------------------------------------------------------------------------------------------------------------------------------------------------------|
|                                 |                        | -Rare protein expression without virus                                                                                            |                                                                                                                                                                                         |
|                                 | Immune Component       | -Drives ganglionic CD8+ immune infiltrate<br>-CD8 may control reactivation events                                                 | -No Immune infiltrate yet reported<br>-Cellular immunity maintains latency                                                                                                              |
| <b>reactivation and disease</b> | Occurrence             | -May Reactivate frequently<br>-Incidence drops with age<br>-Disease similar to primary infection<br>-At same site as 1° infection | -Reactivated disease usually never or once<br>-Incidence rises with age and declining cellular immunity.<br>-Occurs anywhere on body<br>-Disease clinically different from 1° Infection |
|                                 | Ganglionic Spread      | Involves 1 or few neurons                                                                                                         | -Usually intraganglionic spread<br>-Large lesions covering a dermatome.                                                                                                                 |
|                                 | Causes of reactivation | Multiple environmental and physiological factors                                                                                  | -Mainly immune senescence or suppression.<br>-Environmental and physiological factors may contribute                                                                                    |
|                                 | Pain upon reactivation | -Not usually<br>-Some sensory loss with repeated recurrence                                                                       | -Nearly always neurological involvement<br>-90% of zoster has pain<br>-May develop to post herpetic neuralgia                                                                           |

**Table 1: comparison of HSV and VZV with illustrations of differences and similarities**
